# Supplementary material
Source: publisher figshare collection journal article supplement (https://tandf.figshare.com/articles/dataset/_/14169623)
Supplement: Supplementary file 1 [file 2]

**Figure A1.** Prognostic factors for 90-day mortality after diagnosis in patients with metastatic pancreatic cancer (complete case analysis as sensitivity analysis).

**Figure A2.** Prognostic value of predictors for 90-day mortality in metastatic pancreatic cancer, expressed as Nagelkerke's partial  $R^2$  values (complete cases as sensitivity analysis, n=951).

**Table A1.** Definitions of biomarkers.

**Table A2.** Standard clinical factors for the prediction of 90-day mortality in patients with metastatic pancreatic cancer (best clinical model).

**Table A3.** Prognostic factors for overall survival (secondary outcome) after diagnosis in patients with metastatic pancreatic cancer (database after multiple imputation).

**Table A4.** Standard clinical factors for the prediction of 90-day mortality in patients with metastatic pancreatic cancer undergoing palliative chemotherapy (best clinical model).

**Table A5.** Prognostic factors for 90-day mortality after diagnosis in patients with metastatic pancreatic cancer (complete case analysis as sensitivity analysis).

**Table A6.** Prognostic factors for 90-day mortality after diagnosis in patients with metastatic pancreatic cancer (sensitivity analysis after multiple imputation of all predictors except for the biomarker under study).

**Figure A1.** Prognostic factors for 90-day mortality after diagnosis in patients with metastatic pancreatic cancer (complete case analysis as sensitivity analysis).

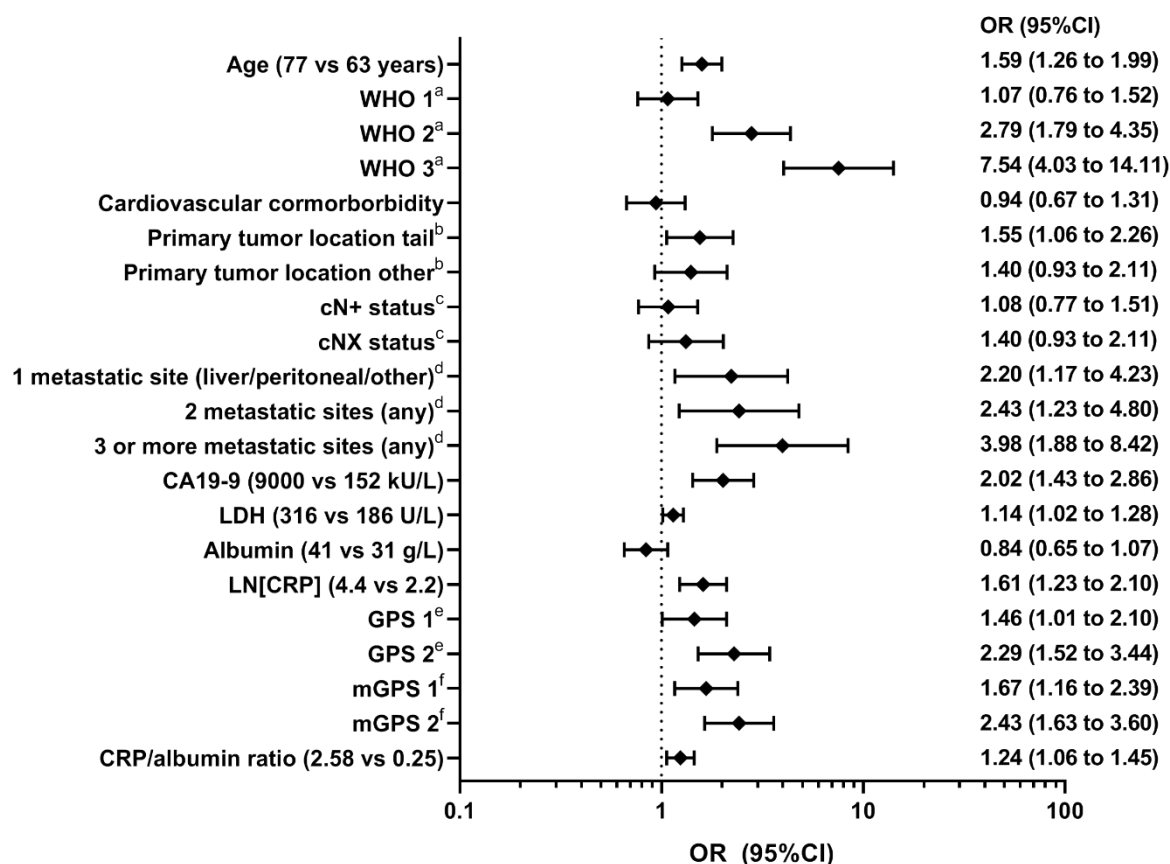

The odds ratios for the continuous variables (age and all biomarkers) are presented as an increase from the lower quartile (25<sup>th</sup> percentile) to the upper quartile (75<sup>th</sup> percentile);

Reference categories are the following: <sup>a</sup>WHO 0; <sup>b</sup>primary tumor location head; <sup>c</sup>cN- status; <sup>d</sup>1 metastatic site (lung/lymph nodes) <sup>e</sup>GPS 0; <sup>f</sup>mGPS 0

**Figure A2.** Prognostic value of predictors for 90-day mortality in metastatic pancreatic cancer, expressed as Nagelkerke's partial  $R^2$  values (complete cases as sensitivity analysis,  $n=951$ ).

**A:** Clinical predictors

**B:** Biomarkers. The figure shows a) the prognostic value each individual biomarker (CA19-9, LDH, CRP, Albumin); unadjusted, adjusted for clinical factors, and after addition of also the biomarkers; b) the prognostic value of four combinations of CRP and albumin (GPS, mGPS, CRP/albumin ratio, and LN[CRP] and albumin as continuous variables), unadjusted, adjusted for clinical factors, and after addition of the remaining biomarkers (i.e. CA19-9 and LDH); c) all four biomarkers combined; unadjusted and adjusted for clinical factors (as there are no remaining biomarkers to add to the model, the red and grey bar show the same results).

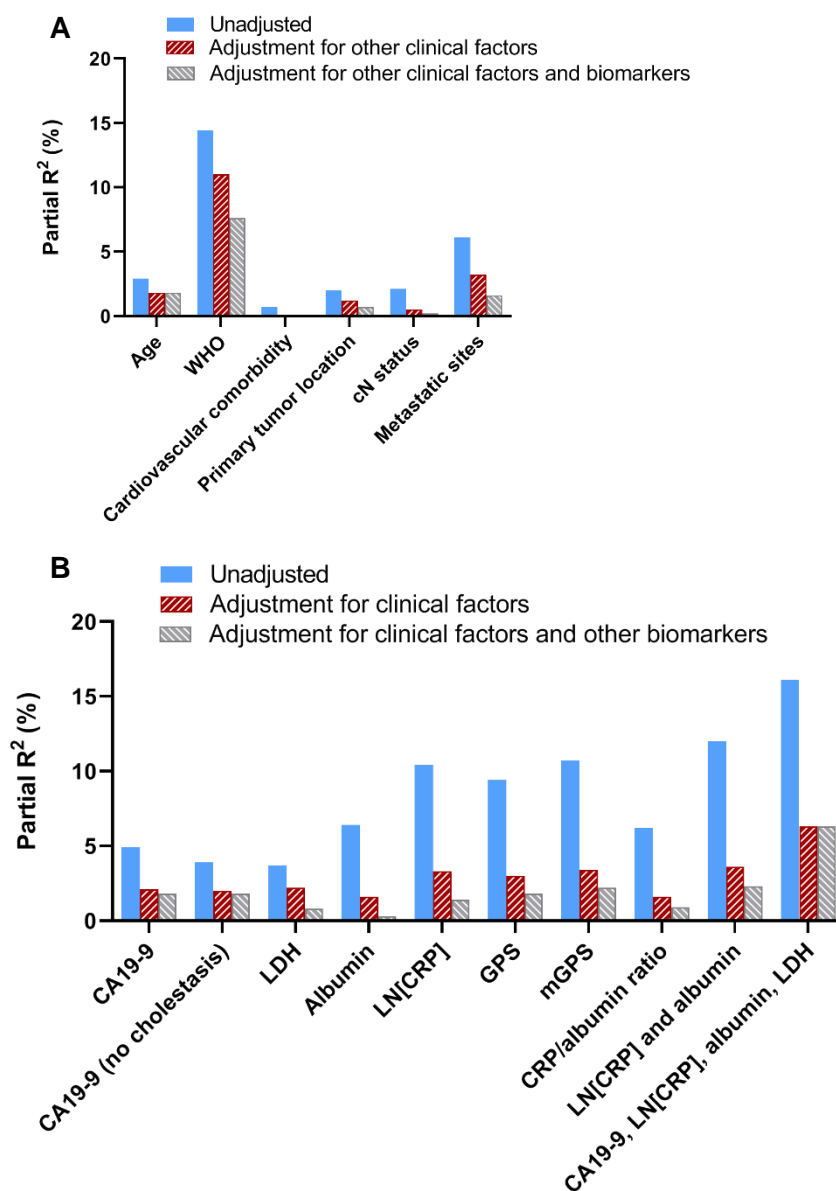

**Table A1.** Definitions of biomarkers.

| Marker            | Units                     | Reference values* | Definitions^                                                                                                                      |
|-------------------|---------------------------|-------------------|-----------------------------------------------------------------------------------------------------------------------------------|
| CA19-9            | kU/L                      | 0-34              | Highest value before start of treatment/decision to renounce treatment, values >9000 are coded as 9000                            |
| Albumin           | g/L                       | 35-50             | Last value before start of treatment/decision to renounce treatment                                                               |
| CRP               | mg/L                      | <5                | Last value before start of treatment/decision to renounce treatment                                                               |
| LDH               | U/L                       | 0-247             | Highest value before start of treatment/decision to renounce treatment                                                            |
| CRP/albumin ratio | CRP: mg/L<br>Albumin: g/L | N/A               | CRP divided by albumin                                                                                                            |
| GPS               | Scale 0-2                 | Score 0           | 1 point each for CRP >10 mg/L or albumin <35 g/L <sup>§</sup>                                                                     |
| mGPS              | Scale 0-2                 | Score 0           | 1 point in case of CRP >10 mg/L, 2 points in case of both CRP >10 mg/L and albumin <35 g/L <sup>§</sup>                           |
| Bilirubin (total) | µmol/L <sup>#</sup>       | <20               | Highest value before start of treatment/decision to renounce treatment; in the case of biliary drainage bilirubin before drainage |

\* Reference values are derived from the Amsterdam UMC, location AMC, and are provided as an indication; reference values differ per laboratory; <sup>#</sup>1 µmol/L = 0.06 mg/dL; <sup>§</sup> The difference between the scores is that for an elevated albumin only, one point is allocated in the GPS, but none in the mGPS.

^The rationale behind these definitions was that CA19-9 and LDH are tumor-related markers, which will not decrease before tumor treatment is started; highest (generally also the last) value is the most relevant. CRP and albumin are also influenced by inflammatory and nutritional status. Inflammation and malnutrition will often be treated before start of treatment/decision to renounce treatment; therefore, the last value was considered the most relevant. Highest total bilirubin value was selected because of the relevance for drainage-related studies.

**Table A2.** Standard clinical factors for the prediction of 90-day mortality in patients with metastatic pancreatic cancer (best clinical model).

| Characteristics                           | Univariable           |        | Multivariable        |              |
|-------------------------------------------|-----------------------|--------|----------------------|--------------|
|                                           | OR (95%CI)            | p      | OR (95%CI)           | p            |
| Increasing age (per 10 years)             | 1.55 (1.45 to 1.65)   | <0.001 | 1.48 (1.37 to 1.59)  | <0.001       |
| Gender                                    |                       | 0.21   |                      | -            |
| Male                                      | Ref                   |        |                      |              |
| Female                                    | 0.92 (0.82 to 1.04)   |        |                      |              |
| Socioeconomic status                      |                       | 0.01   |                      | <sup>a</sup> |
| Low                                       | Ref                   |        |                      |              |
| Medium                                    | 0.81 (0.70 to 0.94)   |        |                      |              |
| High                                      | 0.83 (0.71 to 0.97)   |        |                      |              |
| WHO performance score                     |                       | <0.001 |                      | <0.001       |
| WHO 0                                     | Ref                   |        | Ref                  |              |
| WHO 1                                     | 1.42 (1.19 to 1.69)   |        | 1.25 (1.04 to 1.51)  |              |
| WHO 2                                     | 4.16 (3.10 to 5.56)   |        | 3.40 (2.52 to 4.58)  |              |
| WHO 3 to 4                                | 11.92 (8.37 to 16.96) |        | 9.67 (6.58 to 14.21) |              |
| Cardiovascular comorbidity                | 1.71 (1.49 to 1.96)   | <0.001 | 1.22 (1.04 to 1.43)  | 0.01         |
| Pulmonal comorbidity                      | 1.07 (0.88 to 1.30)   | 0.49   |                      | -            |
| Diabetes Mellitus as comorbidity          | 1.17 (1.02 to 1.35)   | 0.03   |                      | <sup>a</sup> |
| Other malignancy in history               | 0.96 (0.82 to 1.12)   | 0.59   |                      | -            |
| Primary tumor location                    |                       | <0.001 |                      | <0.001       |
| Head/corpus                               | Ref                   |        | Ref                  |              |
| Tail                                      | 1.53 (1.32 to 1.78)   |        | 1.39 (1.17 to 1.66)  |              |
| Other/not otherwise specified/overlapping | 1.37 (1.16 to 1.63)   |        | 1.16 (0.95 to 1.42)  |              |
| Primary tumor diameter (per cm increase)  | 1.03 (0.99 to 1.07)   | 0.10   |                      | -            |
| cT stage (TNM 8)                          |                       | <0.001 |                      | <sup>a</sup> |
| Tis/T0/T1/T2                              | Ref                   |        |                      |              |
| T3/T4                                     | 1.19 (1.04 to 1.36)   |        |                      |              |
| TX                                        | 1.91 (1.56 to 2.34)   |        |                      |              |
| cN status                                 |                       | <0.001 |                      | <0.001       |
| N to                                      | Ref                   |        | Ref                  |              |
| N+                                        | 1.22 (1.07 to 1.40)   |        | 1.30 (1.11 to 1.53)  |              |
| NX                                        | 2.12 (1.78 to 2.52)   |        | 1.82 (1.49 to 2.23)  |              |
| Location/number metastatic sites          |                       | <0.001 |                      | <0.001       |
| 1 site (Lung/distant nodes)               | Ref                   |        | Ref                  |              |
| 1 site (Liver/peritoneal/other            | 3.28 (2.53 to 4.24)   |        | 3.61 (2.66 to 4.90)  |              |
| 2 sites (any)                             | 4.00 (3.04 to 5.25)   |        | 4.12 (2.98 to 5.71)  |              |
| 3 or more sites (any)                     | 6.41 (4.71 to 8.74)   |        | 5.64 (3.96 to 8.04)  |              |

Data after multiple imputation. In complete case analysis, the best possible clinical model contained the exact same predictors (n=2108 in final multivariable analysis); <sup>a</sup> Removed in backward selection

**Table A3.** Prognostic factors for overall survival (secondary outcome) after diagnosis in patients with metastatic pancreatic cancer (database after multiple imputation).

|                                       | Univariable         |        | Multivariable, adjusted for clinical factors only* |        | Multivariable, adjusted for clinical factors* and other biomarkers |                     |
|---------------------------------------|---------------------|--------|----------------------------------------------------|--------|--------------------------------------------------------------------|---------------------|
| Biomarker                             | HR (95%CI)          | p      | HR (95%CI)                                         | p      | HR (95%CI)                                                         | p                   |
| CA19.9 (per 1000 U/L increase)        | 1.04 (1.03 to 1.05) | <0.001 | 1.03 (1.02 to 1.05)                                | <0.001 | 1.03 (1.02 to 1.05)                                                | <0.001              |
| LDH (per 100 U/L increase)            | 1.05 (1.03 to 1.06) | <0.001 | 1.04 (1.03 to 1.05)                                | <0.001 | 1.03 (1.02 to 1.04)                                                | <0.001              |
| Albumin (per unit increase)           | 0.96 (0.95 to 0.96) | <0.001 | 0.97 (0.96 to 0.98)                                | <0.001 | 0.98 (0.97 to 0.99)                                                | <0.001              |
| LN[CRP]                               | 1.28 (1.24 to 1.31) | <0.001 | 1.22 (1.18 to 1.26)                                | <0.001 | 1.17 (1.13 to 1.21)                                                | <0.001              |
| GPS                                   |                     | <0.001 |                                                    | <0.001 |                                                                    | <0.001 <sup>#</sup> |
| 0                                     | Ref                 |        |                                                    |        | Ref                                                                |                     |
| 1                                     | 1.51 (1.37 to 1.67) |        | 1.38 (1.25 to 1.52)                                |        | 1.35 (1.22 to 1.49)                                                |                     |
| 2                                     | 2.55 (2.32 to 2.82) |        | 2.00 (1.81 to 2.22)                                |        | 1.94 (1.76 to 2.15)                                                |                     |
| mGPS                                  |                     | <0.001 |                                                    | <0.001 |                                                                    | <0.001 <sup>#</sup> |
| 0                                     | Ref                 |        | Ref                                                |        | Ref                                                                |                     |
| 1                                     | 1.50 (1.36 to 1.65) |        | 1.37 (1.24 to 1.51)                                |        | 1.34 (1.22 to 1.48)                                                |                     |
| 2                                     | 2.46 (2.24 to 2.70) |        | 1.95 (1.77 to 2.15)                                |        | 1.90 (1.73 to 2.08)                                                |                     |
| CRP/albumin ratio (per unit increase) | 1.11 (1.09 to 1.12) | <0.001 | 1.09 (1.07 to 1.10)                                | <0.001 | 1.09 (1.07 to 1.10)                                                | <0.001 <sup>#</sup> |

LN[CRP] = logarithmic transformation of CRP;

\*Adjusted for age, WHO performance status, cardiovascular disease, location of primary tumor, cN status, location/number of metastatic sites;

<sup>#</sup> Not adjusted for albumin and CRP as mGPS, GPS and CPR/albumin ratio are composed of these biomarkers

**Table A4.** Standard clinical factors for the prediction of 90-day mortality in patients with metastatic pancreatic cancer undergoing palliative chemotherapy (best clinical model).

|                                                       | Univariable           |        | Multivariable        |              |
|-------------------------------------------------------|-----------------------|--------|----------------------|--------------|
| Characteristics                                       | OR (95%CI)            | p      | OR (95%CI)           | p            |
| Increasing age (per 10 years)                         | 1.07 (0.91 to 1.25)   | 0.44   |                      | -            |
| Gender                                                |                       | 0.10   |                      | -            |
| Male                                                  | Ref                   |        |                      |              |
| Female                                                | 0.79 (0.59 to 1.05)   |        |                      |              |
| Socioeconomic status                                  |                       | 0.67   |                      | -            |
| Low                                                   | Ref                   |        |                      |              |
| Medium                                                | 0.87 (0.62 to 1.23)   |        |                      |              |
| High                                                  | 0.99 (0.69 to 1.43)   |        |                      |              |
| WHO performance score                                 |                       | <0.001 |                      | <0.001       |
| WHO 0                                                 | Ref                   |        | Ref                  |              |
| WHO 1                                                 | 1.90 (1.25 to 2.89)   |        | 1.56 (1.04 to 2.33)  |              |
| WHO 2 to 4                                            | 4.52 (2.70 to 7.58)   |        | 4.92 (3.09 to 7.84)  |              |
| Cardiovascular comorbidity                            | 0.81 (0.56 to 1.17)   | 0.26   |                      | -            |
| Pulmonal comorbidity                                  | 0.91 (0.54 to 1.52)   | 0.71   |                      | -            |
| Diabetes Mellitus as comorbidity                      | 1.14 (0.82 to 1.58)   | 0.45   |                      | -            |
| Other malignancy in history                           | 1.14 (0.78 to 1.67)   | 0.49   |                      | -            |
| Primary tumor location                                |                       | <0.001 |                      | <0.001       |
| Head/corpus/other/not otherwise specified/overlapping | Ref                   |        | Ref                  |              |
| Tail                                                  | 1.93 (1.42 to 2.62)   |        | 1.82 (1.31 to 2.53)  |              |
| Tumor diameter (per cm increase)                      | 1.03 (0.99 to 1.06)   | 0.12   |                      | -            |
| cT stage (TNM 8)                                      |                       | 0.004  |                      | 0.05         |
| Tis/T0/T1/T2                                          | Ref                   |        | Ref                  |              |
| T3/T4                                                 | 1.56 (1.10 to 2.23)   |        | 1.45 (1.00 to 2.09)  |              |
| TX                                                    | 2.17 (1.30 to 3.61)   |        | 1.76 (1.02 to 3.06)  |              |
| cN status                                             |                       | 0.14   |                      | <sup>a</sup> |
| N to                                                  | Ref                   |        |                      |              |
| N+                                                    | 1.22 (0.89 to 1.67)   |        |                      |              |
| NX                                                    | 1.49 (0.99 to 2.24)   |        |                      |              |
| Location/number metastatic sites                      |                       | <0.001 |                      | <0.001       |
| 1 site (Lung/distant nodes)                           | Ref                   |        | Ref                  |              |
| 1 site (Liver/peritoneal/other)                       | 6.16 (3.66 to 10.34)  |        | 5.89 (2.09 to 16.61) |              |
| 2 sites (any)                                         | 8.44 (3.09 to 23.06)  |        | 7.07 (2.47 to 20.24) |              |
| 3 or more sites (any)                                 | 10.94 (3.78 to 31.69) |        | 7.83 (2.62 to 23.38) |              |

Data after multiple imputation. In complete case analysis, the best possible clinical model contained the exact same predictors (n=902 in final multivariable analysis);

<sup>a</sup> Removed in backward selection

**Table A5.** Prognostic factors for 90-day mortality after diagnosis in patients with metastatic pancreatic cancer (complete case analysis as sensitivity analysis).

|                                       | Univariable         |        | Multivariable, adjusted for clinical factors only* |        | Multivariable, adjusted for clinical factors* and other biomarkers |                     |
|---------------------------------------|---------------------|--------|----------------------------------------------------|--------|--------------------------------------------------------------------|---------------------|
| Biomarker                             | OR (95%CI)          | p      | OR (95%CI)                                         | p      | OR (95%CI)                                                         | p                   |
| <b>Total group</b>                    |                     |        |                                                    |        |                                                                    |                     |
| CA19 to 9 (per 1000 U/L increase)     | 1.09 (1.07 to 1.12) | <0.001 | 1.07 (1.04 to 1.11)                                | <0.001 | 1.08 (1.04 to 1.13)                                                | <0.001              |
| LDH (per 100 U/L increase)            | 1.31 (1.25 to 1.38) | <0.001 | 1.21 (1.13 to 1.30)                                | <0.001 | 1.11 (1.01 to 1.21)                                                | 0.03                |
| Albumin (per unit increase)           | 0.92 (0.91 to 0.93) | <0.001 | 0.95 (0.94 to 0.97)                                | <0.001 | 0.98 (0.96 to 1.01)                                                | 0.16                |
| LN[CRP]                               | 1.75 (1.65 to 1.85) | <0.001 | 1.39 (1.28 to 1.50)                                | <0.001 | 1.24 (1.10 to 1.40)                                                | <0.001              |
| GPS                                   |                     | <0.001 |                                                    | <0.001 |                                                                    | <0.001 <sup>#</sup> |
| 0                                     | Ref                 |        | Ref                                                |        | Ref                                                                |                     |
| 1                                     | 2.55 (2.08 to 3.13) |        | 1.98 (1.46 to 2.69)                                |        | 1.46 (1.02 to 2.20)                                                |                     |
| 2                                     | 6.33 (5.10 to 7.86) |        | 2.97 (2.15 to 4.12)                                |        | 2.29 (1.52 to 3.44)                                                |                     |
| mGPS                                  |                     | <0.001 |                                                    | <0.001 |                                                                    | <0.001 <sup>#</sup> |
| 0                                     | Ref                 |        | Ref                                                |        | Ref                                                                |                     |
| 1                                     | 2.86 (2.35 to 3.49) |        | 2.31 (1.71 to 3.11)                                |        | 1.67 (1.16 to 2.39)                                                |                     |
| 2                                     | 6.37 (5.18 to 7.84) |        | 3.14 (2.29 to 4.30)                                |        | 2.43 (1.63 to 3.60)                                                |                     |
| CRP/albumin ratio (per unit increase) | 1.31 (1.26 to 1.37) | <0.001 | 1.12 (1.07 to 1.18)                                | <0.001 | 1.10 (1.03 to 1.17)                                                | 0.007 <sup>#</sup>  |
| <b>Chemotherapy group</b>             |                     |        |                                                    |        |                                                                    |                     |
| CA19 to 9 (per 1000 U/L increase)     | 1.11 (1.06 to 1.16) | <0.001 | 1.10 (1.04 to 1.16)                                | 0.001  | 1.10 (1.03 to 1.17)                                                | 0.007               |
| LDH (per 100 U/L increase)            | 1.19 (1.09 to 1.30) | <0.001 | 1.12 (0.99 to 1.26)                                | 0.06   | 0.94 (0.77 to 1.15)                                                | 0.53                |
| Albumin (per unit increase)           | 0.95 (0.93 to 0.98) | <0.001 | 0.96 (0.93 to 1.00)                                | 0.02   | 0.97 (0.93 to 1.02)                                                | 0.23                |
| LN[CRP]                               | 1.56 (1.38 to 1.76) | <0.001 | 1.31 (1.13 to 1.53)                                | <0.001 | 1.37 (1.11 to 1.69)                                                | 0.004               |
| GPS                                   |                     | <0.001 |                                                    | 0.001  |                                                                    | 0.001 <sup>#</sup>  |
| 0                                     | Ref                 |        | Ref                                                |        | Ref                                                                |                     |
| 1                                     | 2.14 (1.33 to 3.43) |        | 1.97 (1.09 to 3.56)                                |        | 1.80 (0.91 to 3.59)                                                |                     |
| 2                                     | 4.30 (2.62 to 7.07) |        | 3.30 (1.74 to 6.26)                                |        | 3.92 (1.85 to 8.30)                                                |                     |
| mGPS                                  |                     | <0.001 |                                                    | <0.001 |                                                                    | <0.001 <sup>#</sup> |
| 0                                     | Ref                 |        | Ref                                                |        | Ref                                                                |                     |
| 1                                     | 2.93 (1.83 to 4.27) |        | 2.51 (1.39 to 4.54)                                |        | 2.28 (1.15 to 4.51)                                                |                     |
| 2                                     | 5.03 (3.06 to 8.24) |        | 3.73 (1.98 to 7.03)                                |        | 4.45 (2.12 to 9.32)                                                |                     |
| CRP/albumin ratio (per unit increase) | 1.18 (1.10 to 1.26) | <0.001 | 1.07 (0.99 to 1.17)                                | 0.09   | 1.14 (1.03 to 1.27)                                                | 0.02 <sup>#</sup>   |

LN[CRP] = logarithmic transformation of CRP;

Total group: n=4248, n=952 in analyses with adjustment for clinical factors and other biomarkers;

Chemotherapy group: n=1218, n=498 in analyses with adjustment for clinical factors and other biomarkers;

\*Total group: Adjusted for age, WHO performance status, cardiovascular disease, primary tumor

location, cN status, location/number of metastatic sites (best clinical model, see Table A1). In

complete case analysis, the best clinical model was the exact same model as after multiple imputation;



Chemotherapy group: Adjusted for WHO performance score, primary tumor location, cT stage (TNM8), location/number of metastatic sites (best clinical model, see Table A2). In complete case analysis, the best clinical model was the exact same model as after multiple imputation;

# Not adjusted for albumin and CRP as (m)GPS and CPR/albumin ratio are composed of these.

**Table A6.** Prognostic factors for 90-day mortality after diagnosis in patients with metastatic pancreatic cancer (sensitivity analysis after multiple imputation of all predictors except for the biomarker under study).

|                                       |      | Univariable         |        | Multivariable, adjusted for clinical factors only* |        | Multivariable, adjusted for clinical factors* and other biomarkers |                     |
|---------------------------------------|------|---------------------|--------|----------------------------------------------------|--------|--------------------------------------------------------------------|---------------------|
| Biomarker                             | n    | OR (95%CI)          | p      | OR (95%CI)                                         | p      | OR (95%CI)                                                         | p                   |
| CA19.9 (per 1000 U/L increase)        | 2490 | 1.09 (1.07 to 1.12) | <0.001 | 1.08 (1.05 to 1.10)                                | <0.001 | 1.08 (1.05 to 1.10)                                                | <0.001              |
| LDH (per 100 U/L increase)            | 3719 | 1.31 (1.25 to 1.38) | <0.001 | 1.29 (1.22 to 1.36)                                | <0.001 | 1.18 (1.12 to 1.25)                                                | <0.001              |
| Albumin (per unit increase)           | 3244 | 0.92 (0.91 to 0.93) | <0.001 | 0.94 (0.93 to 0.96)                                | <0.001 | 0.98 (0.96 to 0.99)                                                | <0.001              |
| LN[CRP]                               | 3482 | 1.75 (1.66 to 1.85) | <0.001 | 1.55 (1.46 to 1.65)                                | <0.001 | 1.40 (1.30 to 1.50)                                                | <0.001              |
| GPS                                   | 2818 |                     | <0.001 |                                                    | <0.001 |                                                                    | <0.001 <sup>#</sup> |
| 0                                     |      | Ref                 |        |                                                    |        | Ref                                                                |                     |
| 1                                     |      | 2.55 (2.08 to 3.13) |        | 2.14 (1.71 to 2.69)                                |        | 1.87 (1.48 to 2.36)                                                |                     |
| 2                                     |      | 6.33 (5.10 to 7.86) |        | 4.23 (3.32 to 5.38)                                |        | 3.55 (2.77 to 4.53)                                                |                     |
| mGPS                                  | 2818 |                     | <0.001 |                                                    | <0.001 |                                                                    | <0.001 <sup>#</sup> |
| 0                                     |      | Ref                 |        | Ref                                                |        | Ref                                                                |                     |
| 1                                     |      | 2.86 (2.35 to 3.49) |        | 2.35 (1.88 to 2.94)                                |        | 1.88 (1.49 to 2.36)                                                |                     |
| 2                                     |      | 6.37 (5.18 to 7.84) |        | 4.16 (3.29 to 5.24)                                |        | 3.51 (2.73 to 4.51)                                                |                     |
| CRP/albumin ratio (per unit increase) | 2818 | 1.31 (1.26 to 1.37) | <0.001 | 1.23 (1.18 to 1.28)                                | <0.001 | 1.20 (1.15 to 1.26)                                                | <0.001 <sup>#</sup> |

LN[CRP] = logarithmic transformation of CRP;

\*Adjusted for age, WHO performance status, cardiovascular disease, location of primary tumor, cN status, location/number of metastatic sites (Table A1);

<sup>#</sup> Not adjusted for albumin and CRP as mGPS, GPS and CPR/albumin ratio are composed of these biomarkers
